# Supplementary material for: R-loops Associated with Triplet Repeat Expansions Promote Gene Silencing in Friedreich Ataxia and Fragile X Syndrome
Source: PubMed Central journal article supplement (PMC4006715; doi:10.1371/journal.pgen.1004318), 2014-05-01
Supplement: pgen.1004318.s005.pdf [file pgen.1004318.s005.pdf]

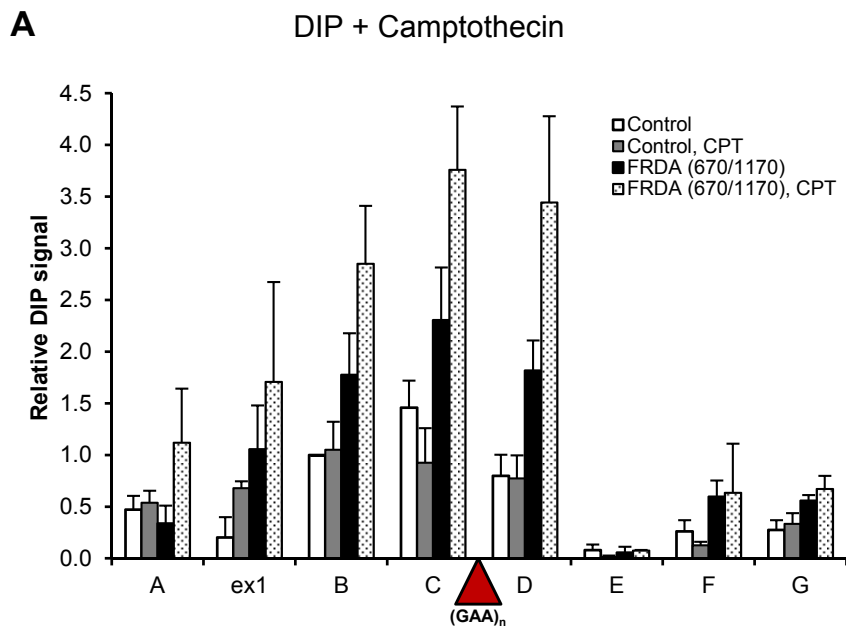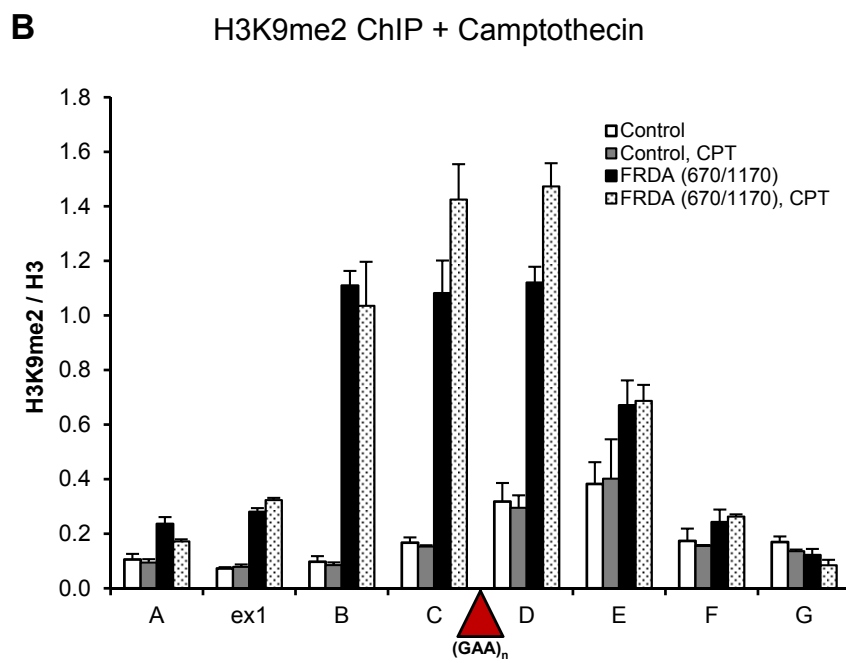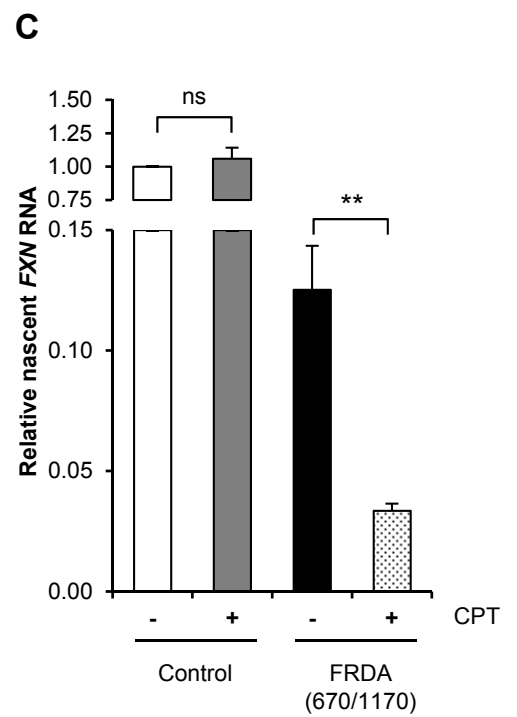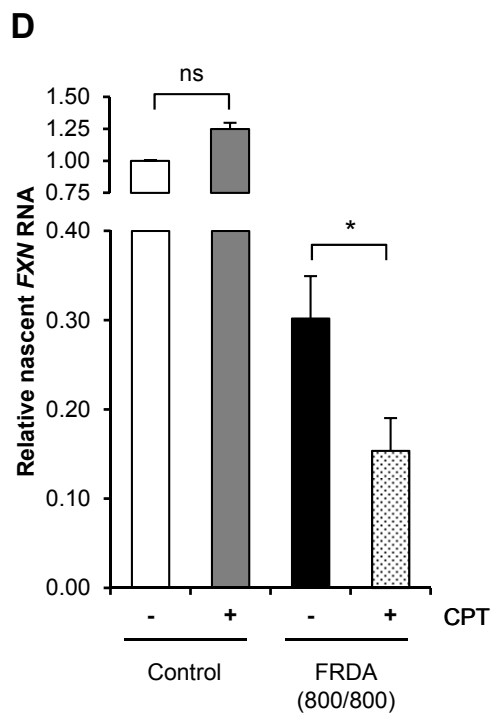

Figure S5
