# Supplementary material for: R-loops Associated with Triplet Repeat Expansions Promote Gene Silencing in Friedreich Ataxia and Fragile X Syndrome
Source: PubMed Central journal article supplement (PMC4006715; doi:10.1371/journal.pgen.1004318), 2014-05-01

**A**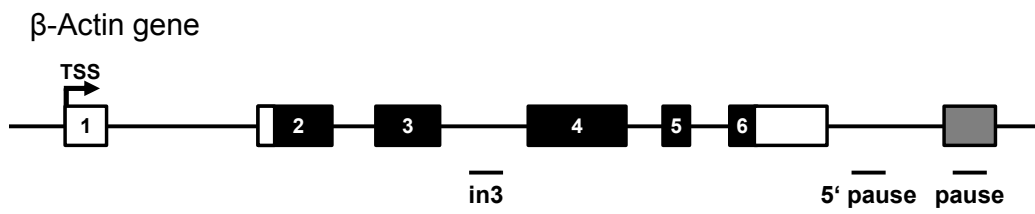**B**

H3K9me2 ChIP

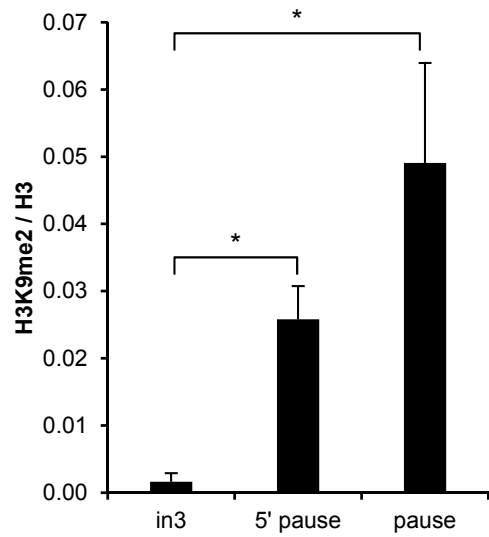

Supplement: pgen.1004318.s006.pdf [file pgen.1004318.s006.pdf]
